# Supplementary material for: Assessment of the latest NGS enrichment capture methods in clinical context
Source: PubMed Central journal article supplement (PMC4750071; doi:10.1038/srep20948), 2016-02-11
Supplement: srep20948-s1.pdf [file srep20948-s1.pdf]

## Assessment of the latest NGS enrichment capture methods in clinical context

Gema García-García, David Baux, Valérie Faugère, Mélody Moclyn, Michel Koenig, Mireille Claustres, Anne-Françoise Roux

### Supplementary Information

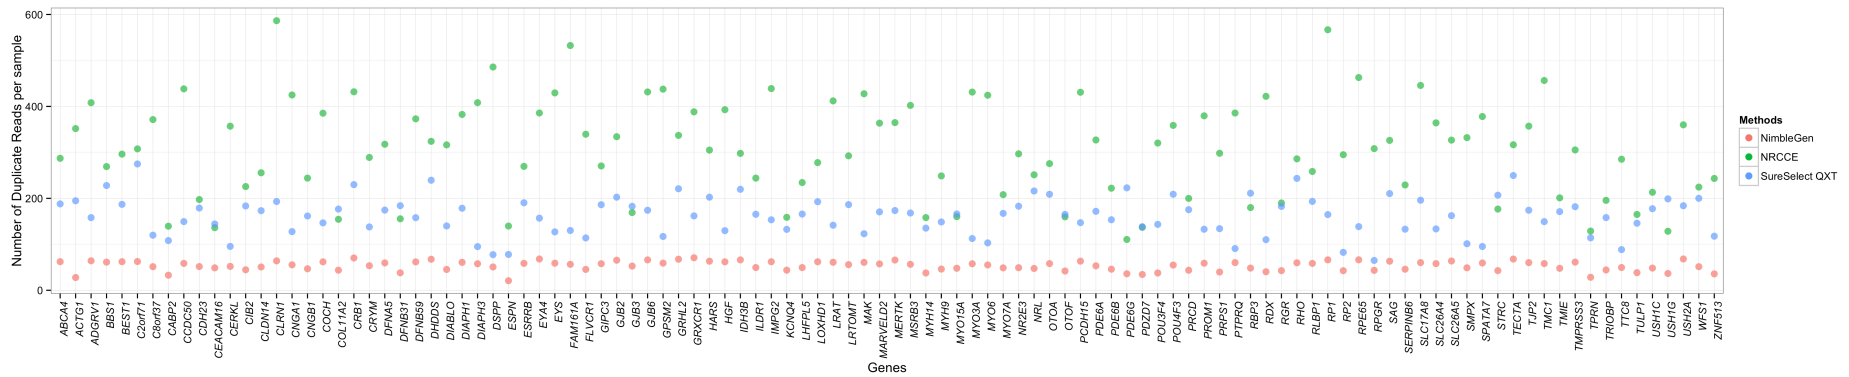

Supplementary Figure S1: Distribution of duplicate reads along the studied genes.

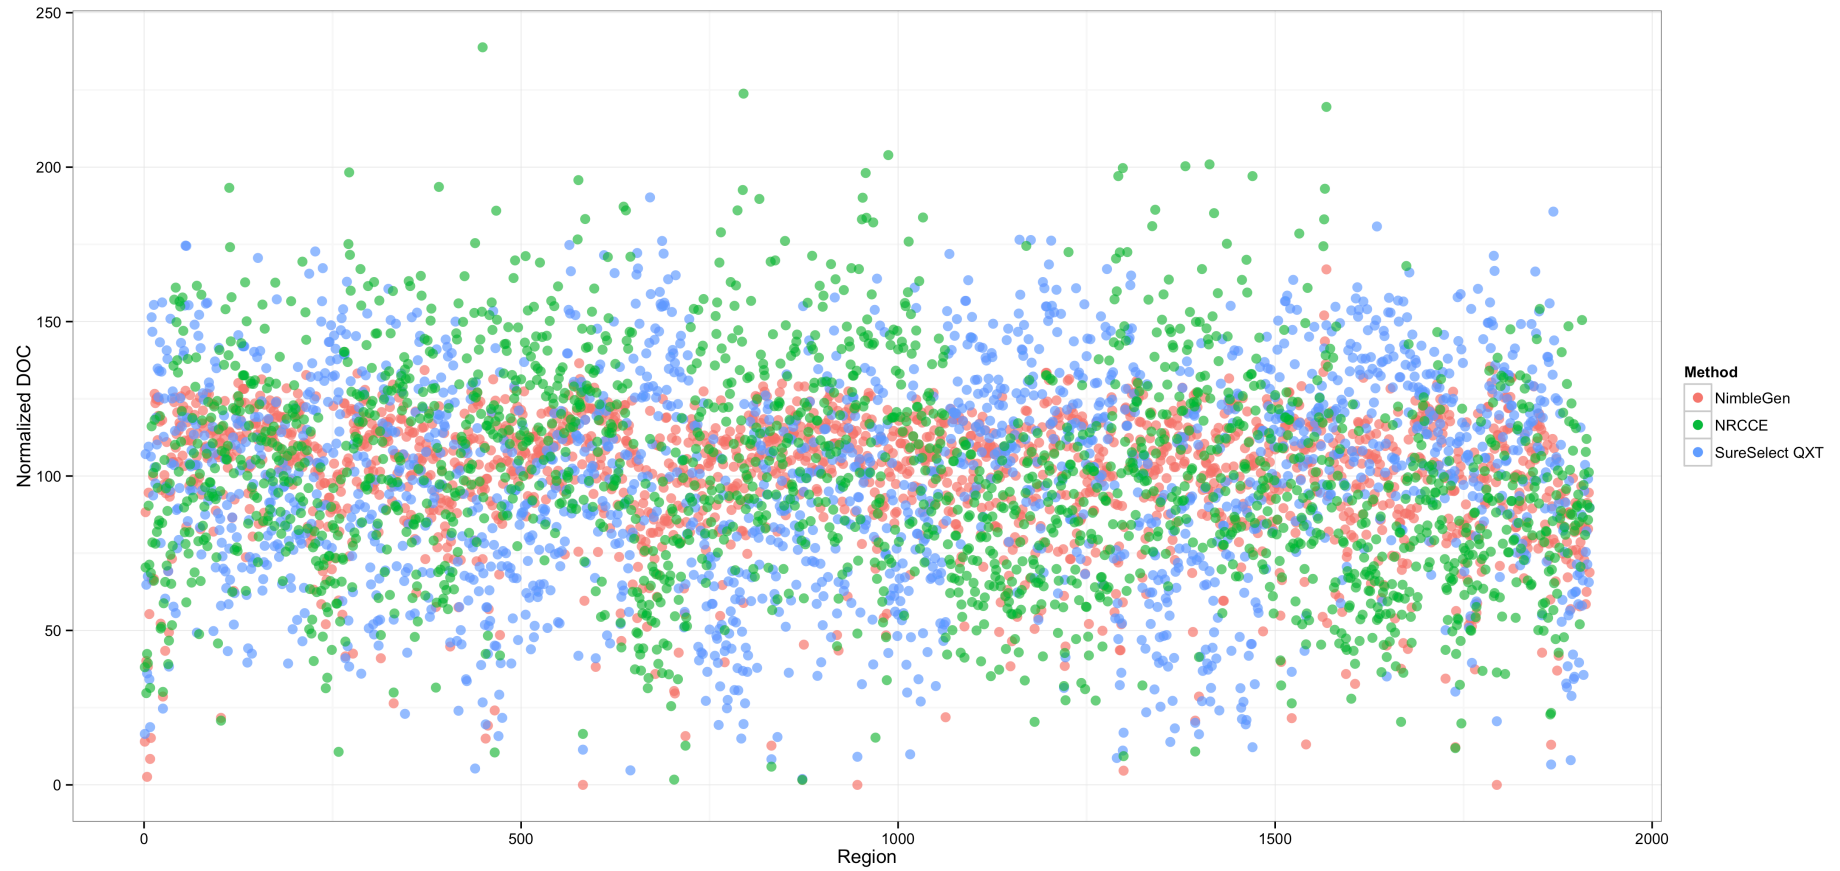

**Supplementary Figure S2: Mean normalised DOC of the three methods for the 1,984 common regions.**

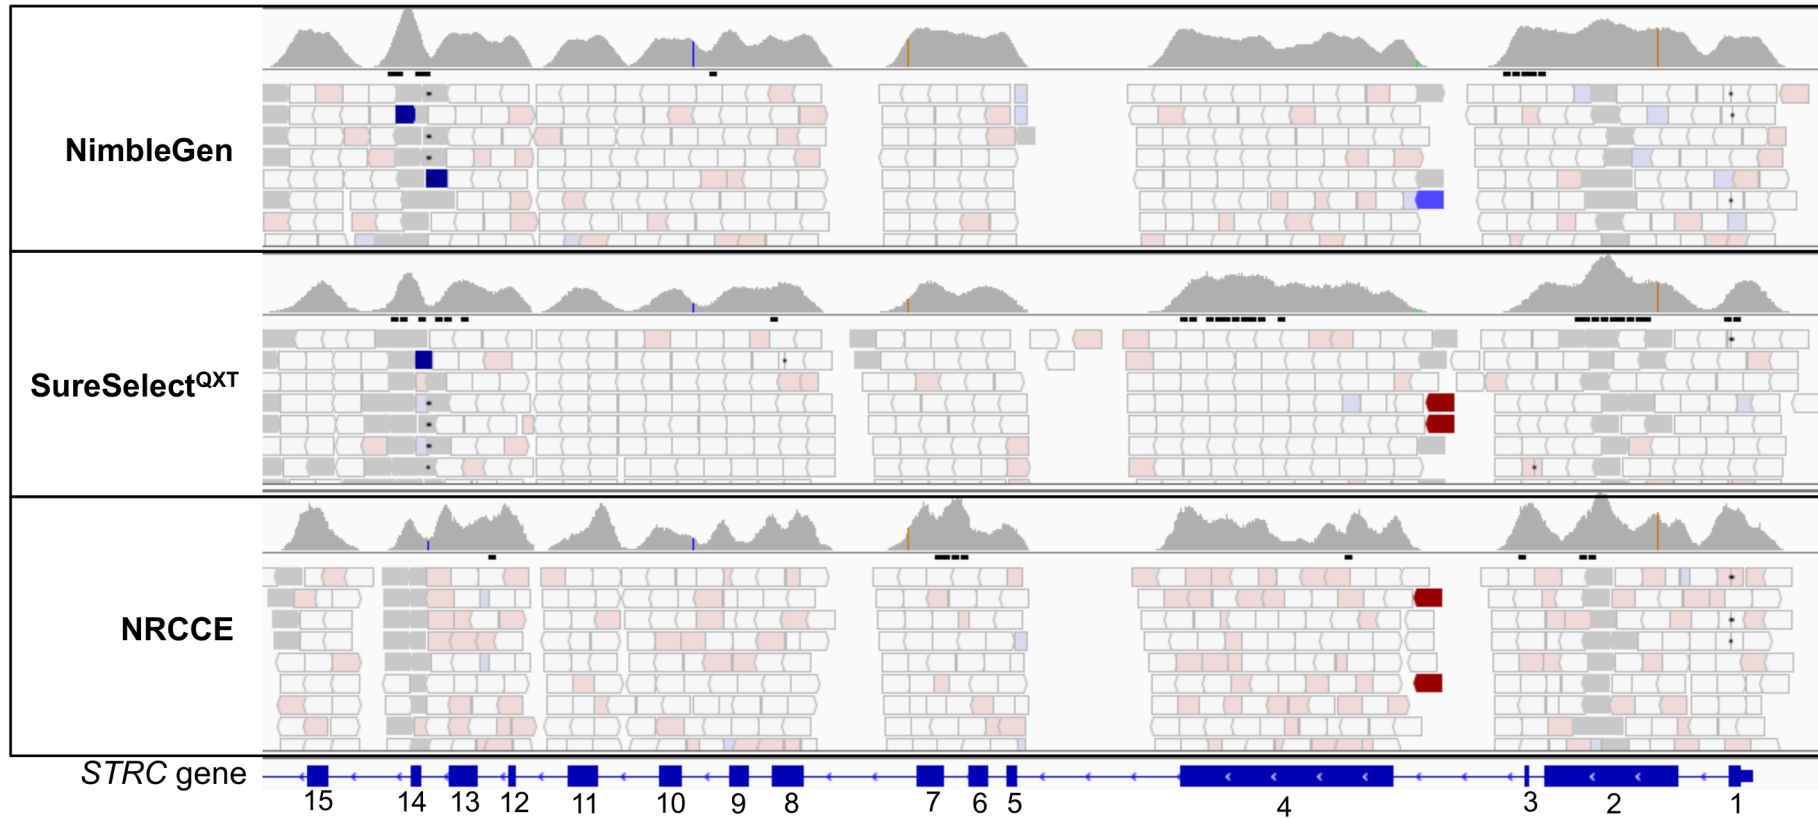

Supplementary Figure S3: IGV view of *STRC* gene sequence for the three methods. Unfilled reads represents reads of poor genomic specificity.

### Simple Repeats

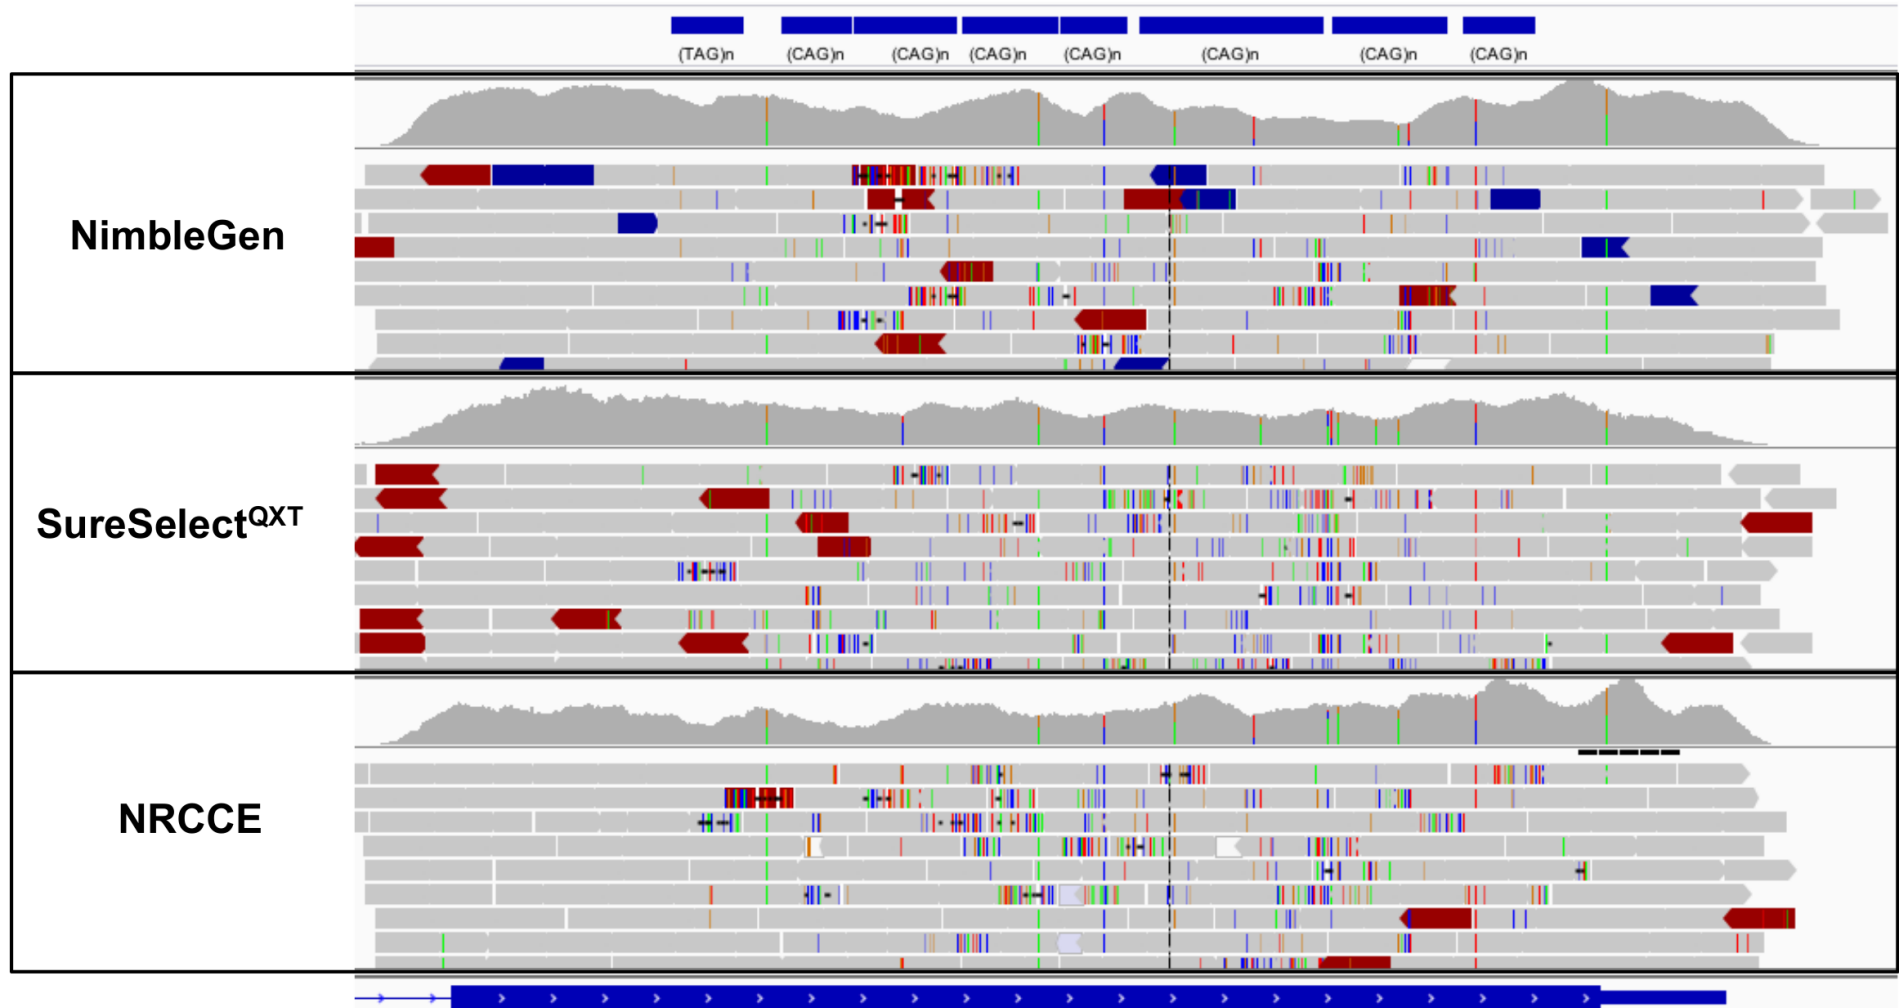

### Exon 5 *DSPP* gene

**Supplementary Figure S4: IGV view of *DSPP* sequence of exon 5 for one DNA.** The low complexity of the genomic sequence results in poor mapping. Each vertical bar or horizontal mark inside the reads represents alignment mismatches.

|                                       | <b>SureSelect QXT</b> | <b>NRCCE</b>       | <b>Nimblegen</b> |
|---------------------------------------|-----------------------|--------------------|------------------|
| <b>Company</b>                        | Agilent               | Illumina           | Roche            |
| <b>Number of genes</b>                | 121                   | 112                | 121              |
| <b>Target size (kb)</b>               | 781                   | 695                | 781              |
| <b>Online tool</b>                    | SureDesign            | DesignStudio       | NimbleDesign     |
| <b>Bioinformatics support offered</b> | Yes                   | No                 | Yes              |
| <b>Probes size</b>                    | 120                   | 80                 | 75.75 (+/-4.62)  |
| <b>Number of probes</b>               | 30961                 | 12966              | NA               |
| <b>Probes density</b>                 | Overlapping (96bp)    | Overlapping (20bp) | Overlapping (NA) |
| <b>Mean probes per base</b>           | 5                     | 1                  | 7                |
| <b>Design stringency</b>              | Intermediate          | Relaxed            | Intermediate     |
| <b>Percentage of target covered</b>   | 99.7                  | 100                | 99.1             |

**Supplementary Table S1: Main characteristics of the three probe designs**

NA: not available

|                                                          | <b>SureSelect<sup>QXT</sup></b> | <b>NRCCE</b>                   | <b>NimbleGen</b>              |
|----------------------------------------------------------|---------------------------------|--------------------------------|-------------------------------|
| <b>Initial DNA amount (ng)</b>                           | 50                              | 50                             | 500                           |
| <b>Fragmentation type</b>                                | Enzymatic                       | Enzymatic                      | Mechanic                      |
| <b>Number of PCR cycles pre- capture</b>                 | 8                               | 10                             | 7                             |
| <b>Pool of patients before hybridization</b>             | No                              | Yes<br>(12 patients / capture) | Yes<br>(4 patients / capture) |
| <b>DNA Amount of each patient for hybridization (ng)</b> | 750                             | 500                            | 250                           |
| <b>Hybridization cycles (time)</b>                       | One (90 min)                    | Two (2h + o/n)                 | One (66-72h)                  |
| <b>Number of PCR cycles post-capture</b>                 | 14                              | 12                             | 14                            |
| <b>Addition of Index</b>                                 | After capture                   | Before capture                 | Before capture                |

**Supplementary Table S2: protocol characteristics of the 3 library preparation methods**

o/n: overnight

| Library parameters (Means on 2 independant runs- per sample)                           | SureSelect <sup>QXT</sup> (A) | NRCCE (I) | Nimblegen (N) | Wilcoxon signed-sum test unilateral hypothesis |          |                |          |                | A: Agilent; I: Illumina; N: NimbleGen |  |
|----------------------------------------------------------------------------------------|-------------------------------|-----------|---------------|------------------------------------------------|----------|----------------|----------|----------------|---------------------------------------|--|
|                                                                                        |                               |           |               | H <sub>0</sub>                                 | p-value  | H <sub>0</sub> | p-value  | H <sub>0</sub> | p-value                               |  |
| <i>Median Insert Size</i>                                                              | 224.83                        | 187.50    | 187.63        | I<N                                            | 0.9173   | I<A            | 9.64E-06 | N<A            | 9.61E-06                              |  |
| <i>Insert Size SD</i>                                                                  | 76.58                         | 46.75     | 35.96         | I>N                                            | 1.64E-04 | I<A            | 9.66E-06 | N<A            | 9.65E-06                              |  |
| <i>% of duplicates reads</i>                                                           | 18.59                         | 41.24     | 7.77          | I>N                                            | 5.96E-08 | I>A            | 5.96E-06 | N<A            | 9.69E-06                              |  |
| <b>Run parameters (Means on 2 independant runs - per run)</b>                          |                               |           |               |                                                |          |                |          |                |                                       |  |
| <i>Clusters density (K/mm2)</i>                                                        | 1090                          | 963       | 1070          |                                                |          |                |          |                |                                       |  |
| <i>Bases sequenced (Gb)</i>                                                            | 5.10                          | 4.80      | 5.20          |                                                |          |                |          |                |                                       |  |
| <i>% Q30</i>                                                                           | 89.05                         | 90.15     | 91.60         |                                                |          |                |          |                |                                       |  |
| <i># clusters raw</i>                                                                  | 20197145                      | 18131316  | 20144285      |                                                |          |                |          |                |                                       |  |
| <i>% of Clusters passing filter</i>                                                    | 90.08                         | 91.95     | 91.53         |                                                |          |                |          |                |                                       |  |
| <i>% of duplicates clusters</i>                                                        | 12.88                         | 19.63     | 3.64          |                                                |          |                |          |                |                                       |  |
| <i>% of unindexed clusters passing filter</i>                                          | 2.77                          | 3.10      | 2.85          |                                                |          |                |          |                |                                       |  |
| <i>% of unaligned clusters passing filter</i>                                          | 0.78                          | 0.92      | 1.72          |                                                |          |                |          |                |                                       |  |
| <b>Run parameters (Means on 2 independant runs - per sample)</b>                       |                               |           |               |                                                |          |                |          |                |                                       |  |
| <i># aligned reads</i>                                                                 | 2885743                       | 2614487   | 2866327       | I<N                                            | 0.06776  | I<A            | 0.09375  | N<A            | 0.78880                               |  |
| <i>% of ontarget reads</i>                                                             | 75.09                         | 85.78     | 86.88         | I<N                                            | 0.01913  | I>A            | 5.96E-08 | N>A            | 9.69E-06                              |  |
| <i># aligned bases</i>                                                                 | 415890897                     | 347747806 | 405126563     | I<N                                            | 0.01056  | I<A            | 0.00894  | N<A            | 0.70810                               |  |
| <i>% of on target bases</i>                                                            | 66.30                         | 75.26     | 73.95         | I>N                                            | 0.01548  | I>A            | 5.96E-08 | N>A            | 5.96E-08                              |  |
| <i>% nts &gt; 20X*</i>                                                                 | 99.37                         | 99.04     | 99.32         | I<N                                            | 0.01070  | I<A            | 0.00318  | N<A            | 0.19720                               |  |
| <i>% nts &gt; 50X*</i>                                                                 | 97.36                         | 95.89     | 98.58         | I<N                                            | 0.00012  | I<A            | 0.01699  | N>A            | 0.00037                               |  |
| <i>Mean DOC (+duplicates)*</i>                                                         | 350                           | 371       | 374           | I<N                                            | 0.31150  | I>A            | 0.34200  | N>A            | 0.06401                               |  |
| <i>Mean DOC (-duplicates)*</i>                                                         | 263                           | 217       | 349           | I<N                                            | 4.53E-05 | I<A            | 0.01664  | N>A            | 0.00117                               |  |
| <b>Variant parameters (Means per sample - AB for variants with filter 'PASS' only)</b> |                               |           |               |                                                |          |                |          |                |                                       |  |
| <i># SNVs*</i>                                                                         | 677                           | 663       | 674           | I<N                                            | 0.00033  | I<A            | 9.61E-06 | N<A            | 0.02948                               |  |
| <i>Mean AB (SNVs/het)*</i>                                                             | 0.47                          | 0.48      | 0.47          |                                                |          |                |          |                |                                       |  |
| <i>SD AB (SNVs/het)*</i>                                                               | 0.07                          | 0.08      | 0.07          |                                                |          |                |          |                |                                       |  |
| <i>Mean AB (SNVs/hom)*</i>                                                             | 1.00                          | 1.00      | 1.00          |                                                |          |                |          |                |                                       |  |
| <i>SD AB (SNVs/hom)*</i>                                                               | 0.01                          | 0.01      | 0.01          |                                                |          |                |          |                |                                       |  |
| <i># Indels*</i>                                                                       | 56                            | 50        | 56            | I<N                                            | 2.90E-04 | I<A            | 2.07E-05 | N>A            | 0.99880                               |  |
| <i>Mean AB (Indels/het)*</i>                                                           | 0.45                          | 0.45      | 0.46          |                                                |          |                |          |                |                                       |  |
| <i>SD AB (Indels/het)*</i>                                                             | 0.10                          | 0.10      | 0.10          |                                                |          |                |          |                |                                       |  |
| <i>Mean AB (Indels/hom)*</i>                                                           | 0.96                          | 0.96      | 0.96          |                                                |          |                |          |                |                                       |  |
| <i>SD AB (Indels/hom)*</i>                                                             | 0.05                          | 0.05      | 0.04          |                                                |          |                |          |                |                                       |  |
| <i>Ts/Tv ratio*</i>                                                                    | 2.80                          | 2.82      | 2.81          | I>N                                            | 0.004248 | I>A            | 0.16500  | N>A            | 0.97610                               |  |
| <i>QUAL score*</i>                                                                     | 4485                          | 3167      | 5165          | I<N                                            | 4.17E-06 | I<A            | 0.00033  | N>A            | 0.01243                               |  |
| <i>RMSMapping quality*</i>                                                             | 35.68                         | 33.60     | 37.75         | I<N                                            | 0.001572 | I<A            | 8.35E-07 | N>A            | 0.17240                               |  |
| <i>RMSMapping quality SD*</i>                                                          | 1.40                          | 1.27      | 2.45          |                                                |          |                |          |                |                                       |  |
| <i>Evenness(%)*</i>                                                                    | 82.45                         | 81.72     | 88.42         | I<N                                            | 9.70E-06 | I<A            | 0.00972  | N>A            | 5.96E-08                              |  |
| <i>Enrichment Factor*</i>                                                              | 3203                          | 4048      | 3705          | I>N                                            | 9.70E-06 | I>A            | 9.70E-06 | N>A            | 9.70E-06                              |  |

**Supplementary Table S3: Parameters analysed and computed in this study with statistical p-values when relevant**

SD: Standard deviation

AB: Allele Balance

RMS: Root Mean Square

SNV: Single Nucleotide Variation

\*these parameters have been computed considering common regions between the 3 designs only (1984 regions)

Allele Balances have not been statistically tested as values are substantially equal for each protocol

|                | Family ID     | Gene           | #SNV           | #indels | indel size      | NRCCE   | NimbleGen | SureSelectQXT | Validation method |                   |
|----------------|---------------|----------------|----------------|---------|-----------------|---------|-----------|---------------|-------------------|-------------------|
| Run 1          | <b>S110</b>   | <i>GJB2†</i>   | 0              | 1       | 1               | 1/1     | 1/1       | 1/1           | Sanger sequencing |                   |
|                | <b>S661-1</b> | <i>MYO6†</i>   | 1              | 0       | NA              | 1/1     | 1/1       | 1/1           | Sanger sequencing |                   |
|                | <b>S661-2</b> | <i>MYO6†</i>   | 1              | 0       | NA              | 1/1     | 1/1       | 1/1           | Sanger sequencing |                   |
|                | <b>U1120</b>  | <i>MYO7A*</i>  | 21             | 1       | 22              | 22/22   | 22/22     | 22/22         | Sanger sequencing |                   |
|                |               | <i>CDH23*</i>  | 25             | 0       | NA              | 25/25   | 25/25     | 25/25         | Sanger sequencing |                   |
|                |               | <i>CIB2*</i>   | 1              | 0       | NA              | 1/1     | 1/1       | 1/1           | Sanger sequencing |                   |
|                | <b>U1277</b>  | <i>GJB2*</i>   | 0              | 0       | NA              | 0/0     | 0/0       | 0/0           | Sanger sequencing |                   |
|                |               | <i>MYO15A†</i> | 1              | 1       | 1               | 2/2     | 2/2       | 2/2           | Sanger sequencing |                   |
|                | <b>S1324</b>  | NA             |                |         |                 |         |           |               |                   |                   |
|                | <b>U1347</b>  | <i>GJB2†</i>   | 0              | 0       | NA              | 0/0     | 0/0       | 0/0           | Sanger sequencing |                   |
|                |               | <i>PCDH15†</i> | 1              | 0       | NA              | 1/1     | 1/1       | 1/1           | Sanger sequencing |                   |
|                | <b>U110</b>   | NA             |                |         |                 |         |           |               |                   |                   |
|                | <b>U1389</b>  | <i>USH2A*</i>  | 14             | 1       | 1               | 15/15   | 15/15     | 15/15         | Sanger sequencing |                   |
|                |               | <i>GPR98†</i>  | 2              | 0       | NA              | 2/2     | 2/2       | 2/2           | Sanger sequencing |                   |
|                | <b>U1403</b>  | NA             |                |         |                 |         |           |               |                   |                   |
|                | <b>U1404</b>  | <i>MYO7A*</i>  | 11             | 1       | 2               | 11/12   | 12/12     | 12/12         | Sanger sequencing |                   |
|                |               | <i>GJB2*</i>   | 0              | 0       | NA              | 0/0     | 0/0       | 0/0           | Sanger sequencing |                   |
|                | <b>S1188</b>  | <i>CDH23*</i>  | 23             | 0       | NA              | 23/23‡  | 23/23     | 23/23         | Sanger sequencing |                   |
|                | Run 2         | <b>S370</b>    | <i>GJB2*</i>   | 0       | 0               | NA      | 0/0       | 0/0           | 0/0               | Sanger sequencing |
|                |               |                | <i>LHFPL5†</i> | 1       | 0               | NA      | 1/1       | 1/1           | 1/1               | Sanger sequencing |
| <b>S432</b>    |               | <i>GJB2*</i>   | 0              | 0       | NA              | 0/0     | 0/0       | 0/0           | Sanger sequencing |                   |
| <b>S634</b>    |               | <i>GJB2*</i>   | 1              | 0       | NA              | 1/1     | 1/1       | 1/1           | Sanger sequencing |                   |
|                |               | <i>USH1C†</i>  | 1              | 0       | NA              | 1/1     | 1/1       | 1/1           | Sanger sequencing |                   |
|                |               | <i>USH2A†</i>  | 1              | 0       | NA              | 1/1     | 1/1       | 1/1           | Sanger sequencing |                   |
| <b>S715</b>    |               | <i>GJB2*</i>   | 0              | 0       | NA              | 0/0     | 0/0       | 0/0           | Sanger sequencing |                   |
| <b>S725</b>    |               | <i>GJB2*</i>   | 0              | 0       | NA              | 0/0     | 0/0       | 0/0           | Sanger sequencing |                   |
|                |               | <i>MYH9†</i>   | 1              | 0       | NA              | 1/1     | 1/1       | 1/1           | Sanger sequencing |                   |
| <b>S731</b>    |               | <i>GJB2*</i>   | 1              | 0       | NA              | 1/1     | 1/1       | 1/1           | Sanger sequencing |                   |
| <b>U1396</b>   |               | <i>CLRN1*</i>  | 0              | 0       | NA              | 0/0     | 0/0       | 0/0           | Sanger sequencing |                   |
|                |               | <i>GJB2†</i>   | 0              | 1       | 1               | 1/1     | 1/1       | 1/1           | Sanger sequencing |                   |
| <b>U1410</b>   |               | <i>MYO7A*</i>  | 15             | 0       | NA              | 15/15§  | 15/15     | 15/15         | Sanger sequencing |                   |
|                |               | <i>USH2A†</i>  | 1              | 1       | 1               | 2/2     | 2/2       | 2/2           | Sanger sequencing |                   |
| <b>U1415-1</b> |               | <i>GPR98†</i>  | 2              | 0       | NA              | 2/2     | 2/2       | 2/2           | Sanger sequencing |                   |
| <b>U1415-2</b> |               | NA             |                |         |                 |         |           |               |                   |                   |
| <b>U1420</b>   |               | NA             |                |         |                 |         |           |               |                   |                   |
| <b>U1426</b>   |               | <i>USH2A†</i>  | 0              | 1       | np (1 exon del) | 1/1     | 1/1       | 1/1           | MLPA              |                   |
|                |               | Total          | 125            | 8       |                 | 132/133 | 133/133   | 133/133       |                   |                   |

**Supplementary Table S4: List of patients analysed**

\*Genes previously analysed by Sanger sequencing

†Pathogenic variants confirmed by sanger sequencing or MLPA

‡1 variant was filtered as LowDepth (7 reads)

§For this genotype NRCCE alone reported a variant chr11:g.76908662T>C with borderline allelic balance (21%, then not filtered out, the limit being 20%) - variant not confirmed by Sanger sequencing
